# Supplementary material for: Systematic mapping of contact sites reveals tethers and a function for the peroxisome-mitochondria contact
Source: Springer Nature journal article supplement (doi:10.1038/s41467-018-03957-8), 2018-04-26
Supplement: MOESM1 [file 41467_2018_3957_MOESM1_ESM.pdf]

Systematic mapping of contact sites reveals tethers and a  
function for the peroxisome-mitochondria contact

Shai *et al.*

Supplementary information

Shai *et al.* Supplementary Figure 1

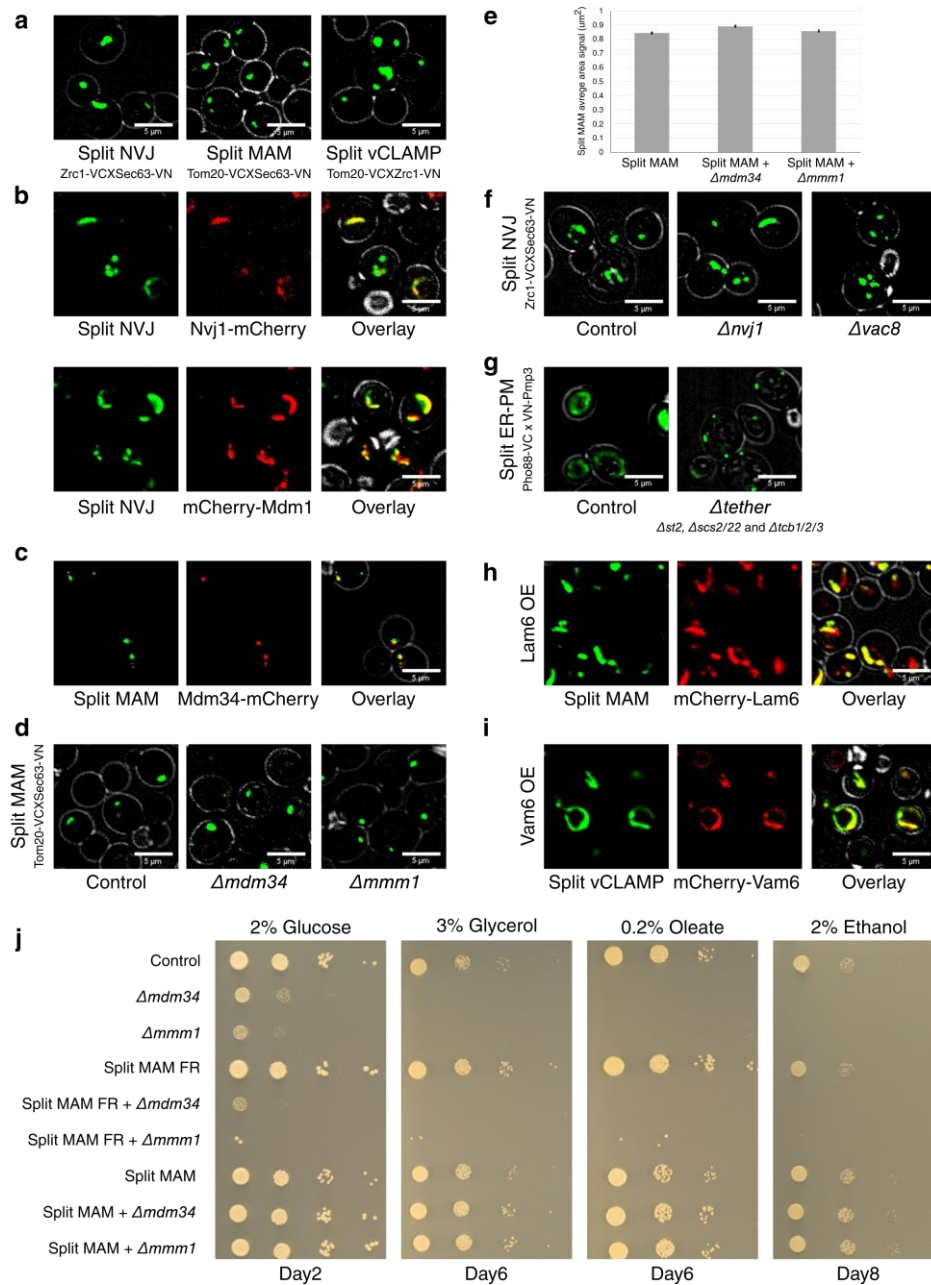

**Supplementary Figure 1. Split Venus reporters can be used to systematically study contact sites.** **a** We created split Venus reporters for the three most studied contact sites in yeast: Vacuole-ER (NVJ), mitochondria-ER (MAM) and vacuole-mitochondria (vCLAMP). **b, c** Known contact site resident proteins co-localize with their respective contact site reporter: Nvj1 and Mdm1 to the NVJ reporter (**b**) and Mdm34 to the MAM reporter (**c**). Thus the fluorescent signal represents the actual contact site. **d, e, f** Single deletions of known tethers do not affect the split reporter signal: The MAM reporter signal was not changed when known MAM tether genes, *MDM34* or *MMM1*, were deleted (**d**). Deleting *MDM34* or *MMM1* did not affect the average MAM reporter signal

( $\mu\text{m}^2$ ). Bar represent mean $\pm$ s.e. from three independent experiments (e). The NVJ reporter signal was not changed when the NVJ tether genes, *NVJ1* or *VAC8*, were deleted (f). g The PM-ER reporter contact site was severely affected by deletions of six known tethering genes ( $\Delta$ tether). h, i The split Venus reporters are affected by manipulating known contact site tethers and regulators: The MAM reporter signal was expanded when Lam6, a known tether of the MAM, was overexpressed (h). The vCLAMP reporter signal was expanded when Vam6, a known tether of the vCLAMP, was overexpressed (i). j A serial dilution growth assay was carried out for control or *Δermes* (*Δmdm34/Δmmm1*) cells, with or without the MAM reporters (Venus or FR) on agar plates containing either 2% glucose, 3% glycerol, 0.2% oleate or 2% ethanol. The MAM reporter, but not the MAM Far Red (FR) reporter, rescued the ability of the *Δermes* strains to grow on glycerol, oleate and ethanol.

## Shai *et al.* Supplementary Figure 2

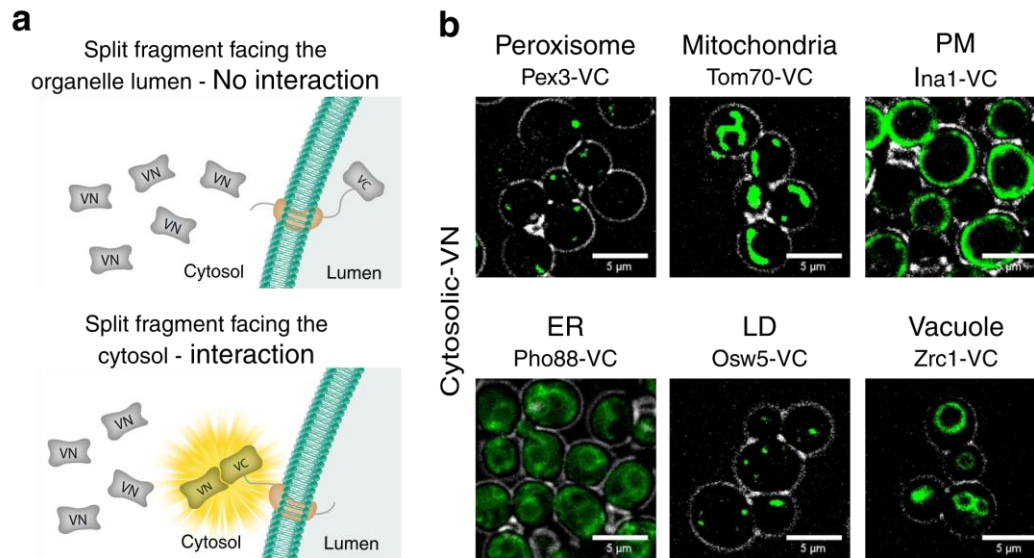

### Supplementary Figure 2. Optimizing the split Venus reporters.

**a** Verifying the localization, expression and orientation of the tagged membrane proteins. To ensure that the candidate proteins are expressed, localized to the correct organelle and that their tagged terminus is facing the cytosol, all candidate proteins were tagged at their C terminus with half of the Venus protein (VC), while the other half (VN) was expressed in the cytosol. **b** Representative images of different membrane proteins that were localized to the desired organelle leading to a fluorescent pattern that is typical to the organelle.

Shai *et al.* Supplementary Figure 3

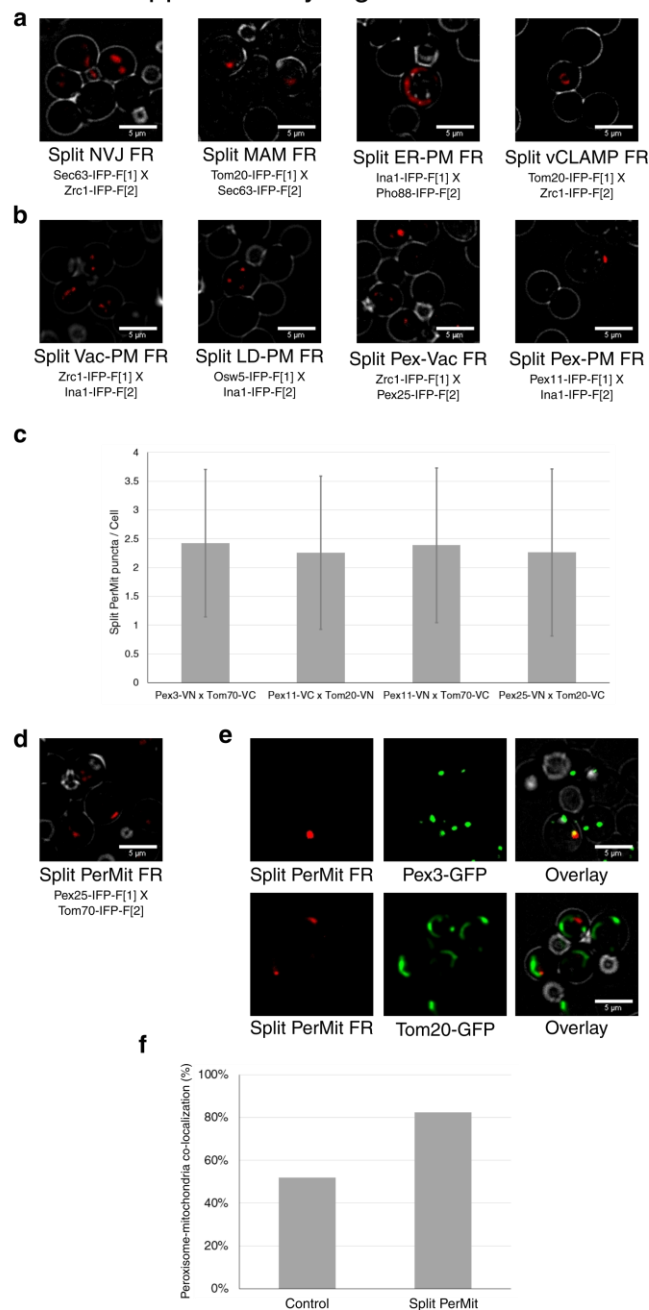

**Supplementary Figure 3. Assaying the capacity of the split reporters to form synthetic tethers.** **a** Split Far Red (FR) reporters were made for known contact sites NVJ, MAM, ER-PM and vCLAMP. **b** Split FR reporters show contacts for the four new cell compartment proximities discovered using split Venus: vacuole-PM (vCOuPLE), LD-PM (pCLIP), peroxisome-vacuole (PerVale) and peroxisome-PM (PerPECs). **c** Quantification of PerMit puncta number per cell for strains expressing different split PerMit reporters. The results show that there was no difference in PerMit puncta when the different reporters were used. Bar represent mean $\pm$ s.d. from three

independent experiments (at least 600 cells from each strain). **d** Peroxisome-mitochondria proximities can be visualized using a split FR reporter. **e** The PerMit FR reporter signal co-localizes to both a peroxisomal marker (Pex3-GFP) and to a mitochondrial marker (Tom20-GFP) demonstrating that it indeed marks sites of close apposition between the two membranes. **f** Quantification of peroxisomes that co-localized with mitochondria with or without the split Venus PerMit reporter. The results imply that the split Venus PerMit reporter stabilizes organelle contacts. Bar represents mean.

## Shai *et al.* Supplementary Figure 4

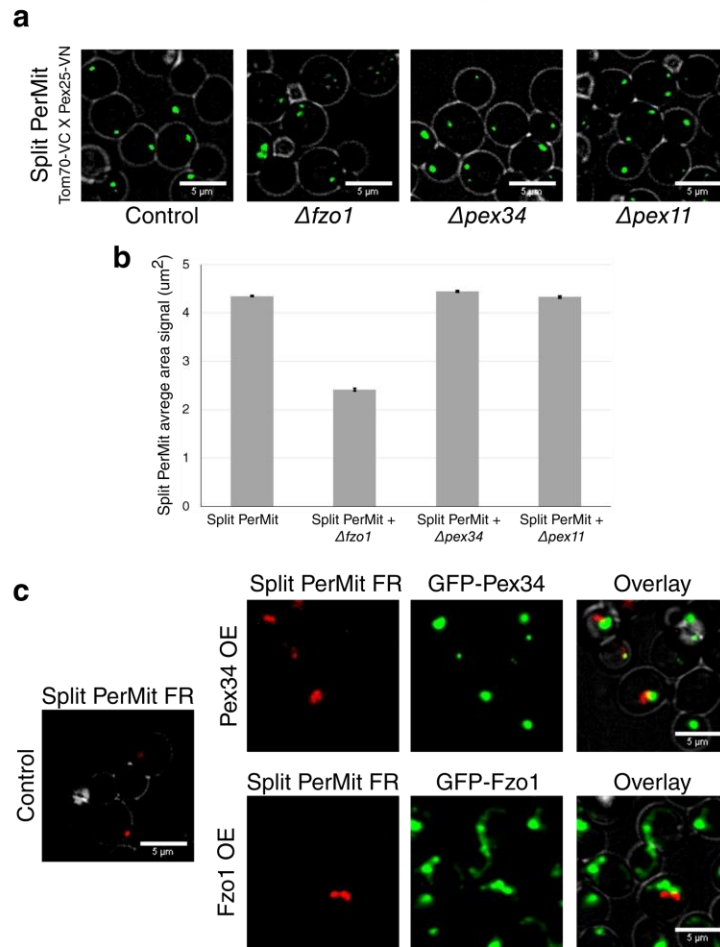

**Supplementary Figure 4. Fzo1 and Pex34 have the characteristics of potential PerMit tethers.** **a** Deletions of *PEX34*, the newly suggested PerMit tether, or *PEX11*, a previously suggested PerMit tether, did not affect the PerMit reporter signal. Deletion of *FZO1*, known to affect mitochondria morphology, affected the PerMit signal but this might be caused by altering mitochondria shape. **b** Quantification of the average PerMit reporter signal ( $\mu\text{m}^2$ ) in control cells or in the background of *FZO1*, *PEX34* or, *PEX11* deletions. Bar represent mean $\pm$ s.e from three independent experiments. The results demonstrate that single deletions of *PEX34* or *PEX11* do not affect the PerMit signal. **c** Pex34 or Fzo1 overexpression (Tef2-GFP-Pex34/Fzo1) led to expansion of the PerMit FR reporter demonstrating that the PerMit expansion is not specific to the presence of the split Venus reporter.

Shai *et al.* Supplementary Figure 5

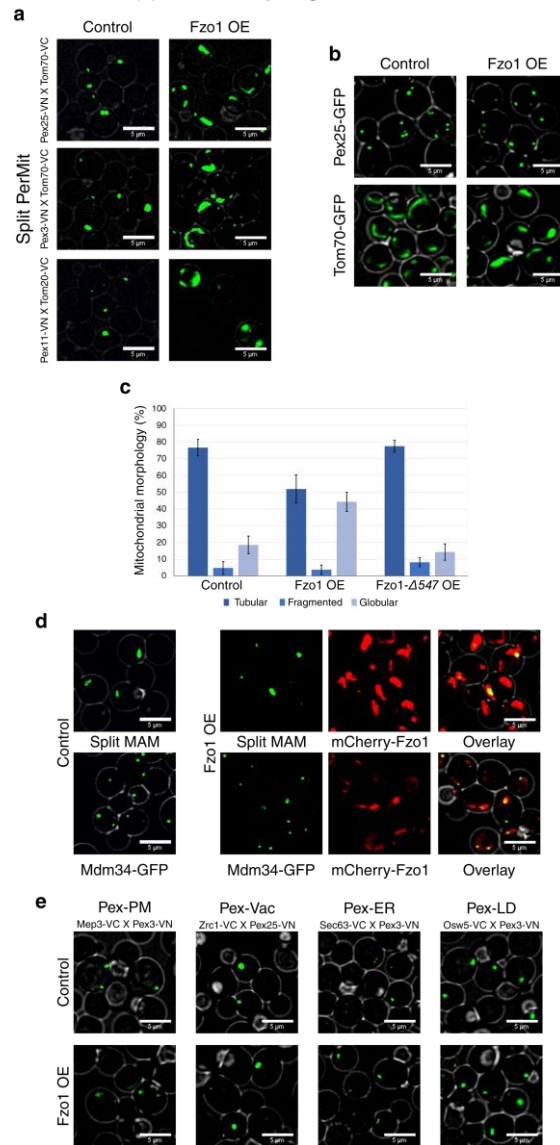

**Supplementary Figure 5. Fzo1 overexpression specifically expands the PerMit contact site.** **a** Fzo1 overexpression (OE) expands different PerMit reporters regardless of the tagged proteins used. **b** Fzo1 OE led to hyper-fusion of mitochondria, detected by Tom70. However, the overexpression did not affect the expression of Pex25. **c** Quantification of mitochondrial morphology assessed by following Tom70-GFP fluorescence in control, Fzo1 OE or truncated Fzo1( $\Delta 547$ ) OE cells. Error bars represent the s.d. from three independent experiments. The results show that the PerMit expansion observed when truncated Fzo1 is overexpressed is not a result of altering mitochondria morphology. **d** Fzo1 OE does not affect the MAM reporter nor the native ERMES complex (marked using Mdm34-GFP) implying a direct effect on the PerMit contact. **e** Fzo1 OE does not affect any of the other peroxisomal contact site reporters suggesting a specific tethering role in the PerMit contact.



Shai *et al.* Supplementary Figure 6

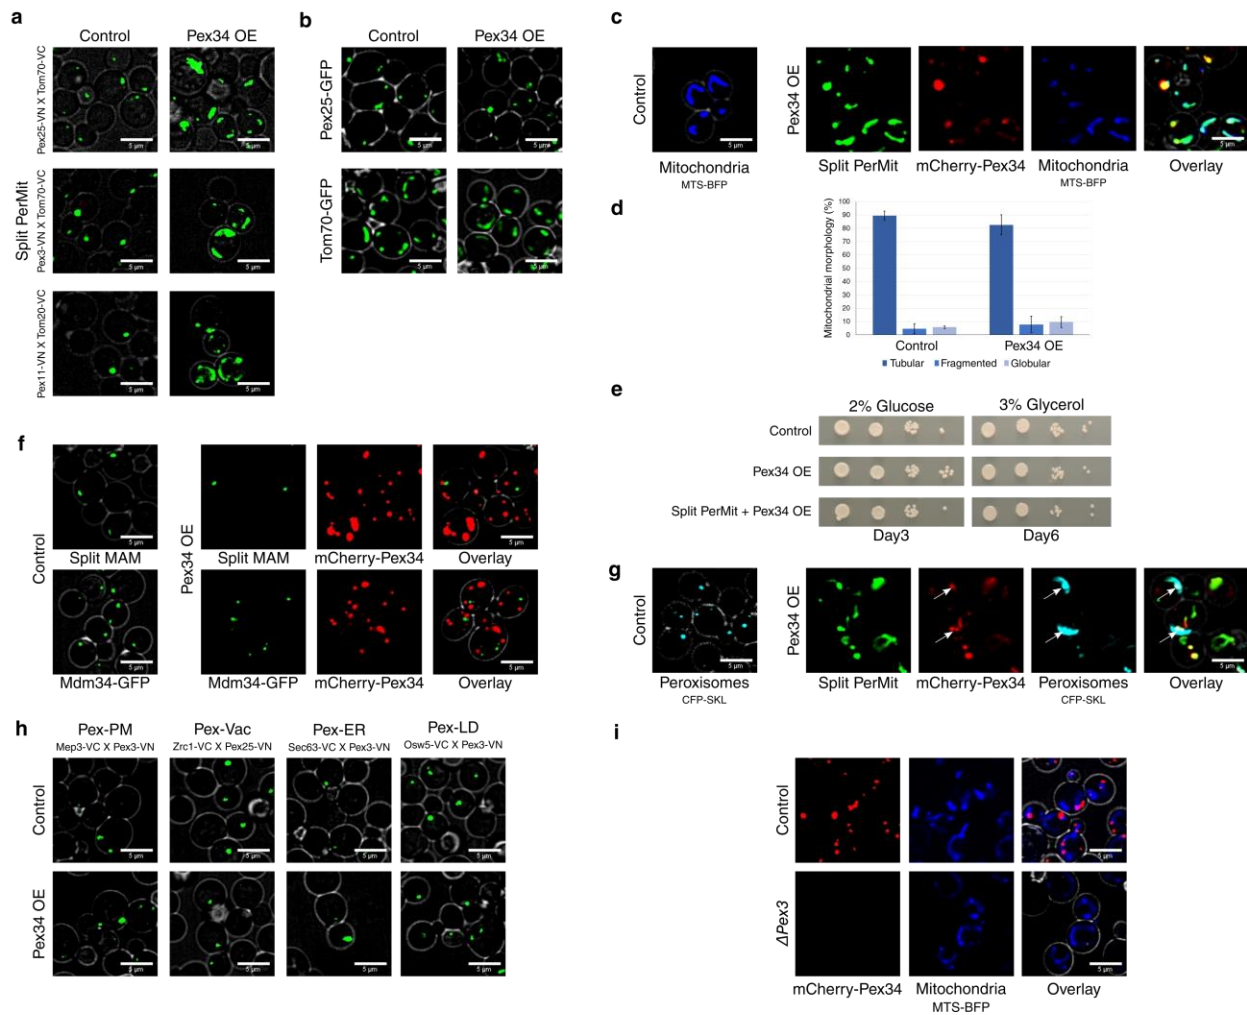

**Supplementary Figure 6. Pex34 overexpression specifically expands the PerMit contact site.**

**a** Pex34 Overexpression (OE) expands different PerMit reporter signals regardless of the tagged protein used. **b** Pex34 OE does not affect the expression or localization of Pex25 and Tom70 demonstrating that the PerMit expansion is not a result of indirect effects on the tagged proteins. **c** Pex34 OE does not affect mitochondrial structure (marked by MTS-BFP). **d** Quantification of mitochondrial morphology assessed by following MTS-BFP fluorescence in control, or Pex34 OE cells. Error bars represent the s.d. from three independent experiments. The results imply that the PerMit expansion observed when Pex34 is overexpressed is not a result of altering mitochondria morphology. **e** A serial dilution growth assay was carried out for control or Pex34 overexpression cells, with or without the split PerMit reporter on agar plates containing either 2% glucose or 3% glycerol. Pex34 overexpression strains are able to grow on glycerol implying that Pex34 OE does not affect the ability to respire. **f** Pex34 OE does not affect the MAM reporter nor the ERMES complex (marked using Mdm34-GFP) implying a direct effect of Pex34 on the PerMit signal. **g** Pex34 OE leads to peroxisome (marked by CFP-SKL) clumping on mitochondria. Pex34 is

enriched in specific peroxisomal niches (White arrows). **h** Pex34 OE does not affect any of the other peroxisomal contact site reporters suggesting a specific role in tethering the PerMit contact. **i** Pex34 is not targeted to mitochondria even when it is overexpressed and no mature peroxisomes exist ( $\Delta pex3$ ). This demonstrates that the PerMit expansion is not caused by mistargeting of Pex34 to mitochondria.

## Shai *et al.* Supplementary Figure 7

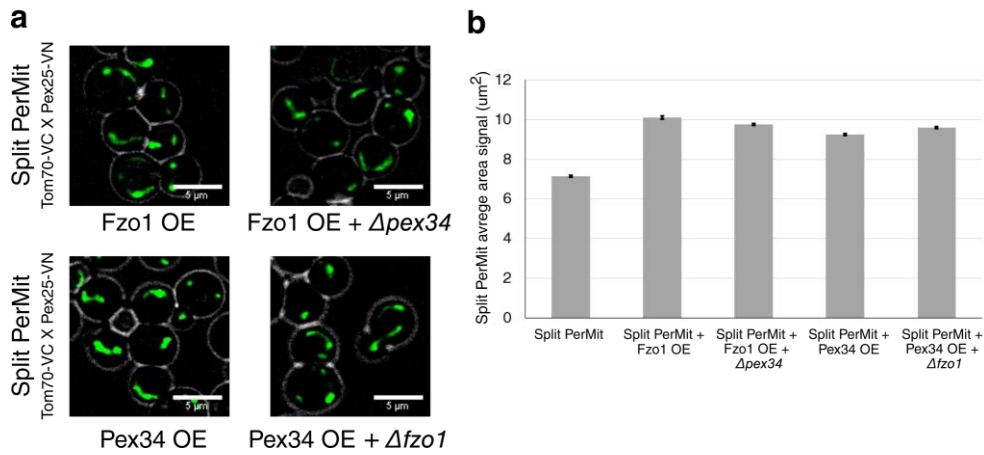

**Supplementary Figure 7. Pex34 and Fzo1 function as different PerMit tether complexes. a** Deletion of *PEX34* does not affect the ability of Fzo1 overexpression to expand the PerMit contact and *vice versa*. **b** Quantification of the average PerMit reporter signal ( $\mu\text{m}^2$ ). Bar represent mean  $\pm$  s.e. from three independent experiments. The results imply that Pex34 and Fzo1 are not part of the same PerMit tethering complex.

Shai *et al.* Supplementary Figure 8

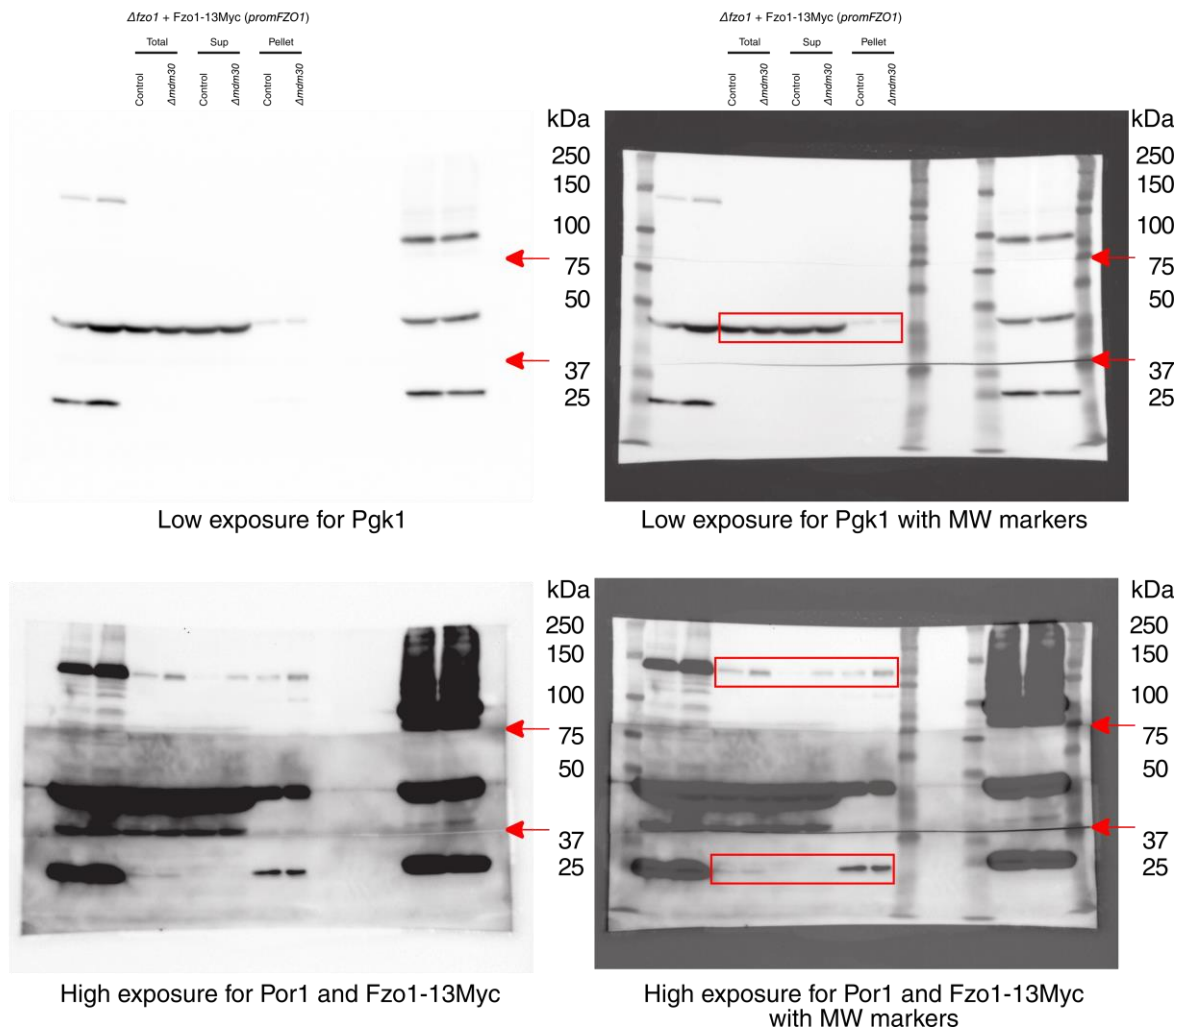

**Supplementary Figure 8. Whole scans of blots shown in Figure 4c.** Low exposure for Pgk1 without (left) and with (right) molecular weights markers are shown in the upper panels. High exposure for Por1 and Fzo1-13Myc without (left) and with (right) molecular weights markers are shown in the lower panels. Molecular weights indicated in kDa. Red boxes mark the parts of the Western blot images that are shown in the indicated figure. Red arrows mark membrane cuts for different primary antibody incubation.

Shai *et al.* Supplementary Figure 9

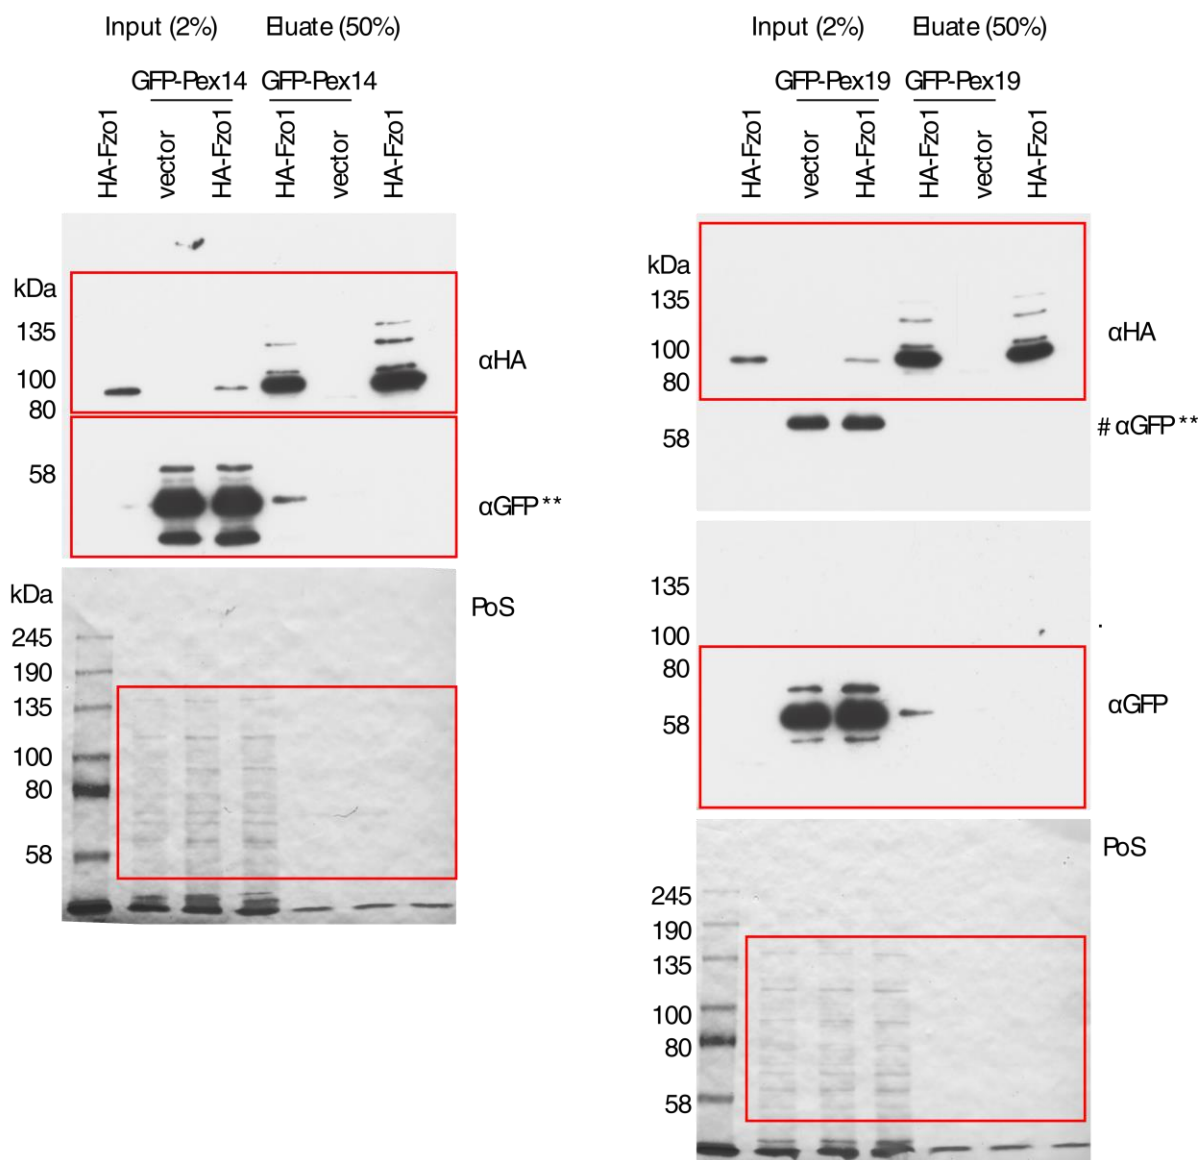

**Supplementary Figure 9. Whole scans of blots shown in Figure 4f.** αGFP\*\* - anti-GFP immunoblotting performed after previous anti-HA immunoblotting of the same membrane, hence explaining the signals of both antibodies on the same blot. # - denotes a panel not shown in Figure 4f. Ponceau S staining (PoS) was used to compare protein levels. Molecular weights indicated in kDa. Red boxes mark the parts of the Western blot images that are shown in the indicated figure.

**Supplementary Table 1 – The membrane proteins from each cell compartment that were utilized for reporter formation.**

| <b>Cell compartment</b>      | <b>Protein</b> | <b>Abundance<br/>(Molecules per cell)</b> | <b>Localization</b> | <b>Orientation of C'</b> | <b>Detected with cytoplasmic split VN?</b> |
|------------------------------|----------------|-------------------------------------------|---------------------|--------------------------|--------------------------------------------|
| <b>Peroxisome</b>            | Ant1           | 2250                                      | Peroxisome          | Cytoplasm                | X                                          |
|                              | Pex3           | 1400                                      | Peroxisome          | Cytoplasm                | √                                          |
|                              | Pex11          | 1630                                      | Peroxisome          | Unknown                  | √                                          |
|                              | Pex25          | 2420                                      | Peroxisome          | Cytoplasm                | √                                          |
|                              | Pex30          | 4570                                      | Peroxisome          | Cytoplasm                | √                                          |
| <b>Mitochondria</b>          | Mdm10          | 768                                       | Mitochondria        | Cytoplasm                | √                                          |
|                              | Mdm34          | 377                                       | Mitochondria        | Cytoplasm                | X                                          |
|                              | Tom20          | 5680                                      | Mitochondria        | Cytoplasm                | √                                          |
|                              | Tom70          | 45300                                     | Mitochondria        | Cytoplasm                | √                                          |
| <b>Endoplasmic Reticulum</b> | Gpi17          | 7520                                      | ER                  | Cytoplasm                | √                                          |
|                              | Mmm1           | 2490                                      | ER                  | Cytoplasm                | X                                          |
|                              | Pho88          | 61800                                     | ER                  | Cytoplasm                | √                                          |
|                              | Sec63          | 17700                                     | ER                  | Cytoplasm                | √                                          |
|                              | Yet1           | 7210                                      | ER                  | Cytoplasm                | √                                          |
| <b>Vacuole</b>               | Mam3           | 5890                                      | Vac. Membrane       | Cytoplasm                | X                                          |
|                              | Vph1           | 55700                                     | Vac. Membrane       | Cytoplasm                | √                                          |
|                              | Zrc1           | 8200                                      | Vac. Membrane       | Cytoplasm                | √                                          |
| <b>Lipid Droplets</b>        | Faa4           | 31200                                     | LD                  | Unknown                  | √                                          |
|                              | Osw5           | 922                                       | LD                  | Cytoplasm                | √                                          |
| <b>Plasma Membrane</b>       | Ina1           | 4280                                      | Cell Periphery      | Cytoplasm                | √                                          |
|                              | Mep3           | 3820                                      | Cell Periphery      | Cytoplasm                | √                                          |
|                              | Pdr5           | 42000                                     | Cell Periphery      | Cytoplasm                | X                                          |
|                              | Yor1           | 3610                                      | Cell Periphery      | Cytoplasm                | √                                          |
| <b>Golgi</b>                 | Akr1           | 4070                                      | Golgi               | Cytoplasm                | X                                          |
|                              | Mnn9           | 1630                                      | Golgi               | Cytoplasm                | X                                          |
|                              | Rbd2           | 7850                                      | Golgi               | Cytoplasm                | X                                          |

**Supplementary Table 2 – Genes whose overexpression led to expansion of the split PerMit reporter signal.**

| <b>Gene Name</b> | <b>ORF Name</b> | <b>mCherry Localization</b> |
|------------------|-----------------|-----------------------------|
| <i>ALY1</i>      | <i>YKR021W</i>  | Cytosol                     |
| <i>ANT1</i>      | <i>YPR128C</i>  | Punctate, Mitochondria      |
| <i>ATG36</i>     | <i>YJL185C</i>  | Punctate                    |
| <i>BPH1</i>      | <i>YCR032W</i>  | Vacuole membrane            |
| <i>CAF4</i>      | <i>YKR036C</i>  | Mitochondria                |
| <i>COS6</i>      | <i>YGR295C</i>  | Vacuole                     |
| <i>DJP1</i>      | <i>YIR004W</i>  | Cell periphery, ER, Bud     |
| <i>ELO1</i>      | <i>YJL196C</i>  | ER                          |
| <i>FIS1</i>      | <i>YIL065c</i>  | Mitochondria                |
| <i>FZO1</i>      | <i>YBR179c</i>  | Mitochondria                |
| <i>GEM1</i>      | <i>YAL048C</i>  | Mitochondria                |
| <i>IDII</i>      | <i>YPL117C</i>  | Cytosol                     |
| <i>IFA38</i>     | <i>YBR159W</i>  | Punctate                    |
| <i>INP1</i>      | <i>YMR204C</i>  | Punctate                    |
| <i>INP2</i>      | <i>YMR163C</i>  | Punctate                    |
| <i>LDB19</i>     | <i>YOR322C</i>  | Cytosol, punctate           |
| <i>LYS1</i>      | <i>YIR034C</i>  | Punctate                    |
| <i>MDM10</i>     | <i>YAL010C</i>  | Mitochondria                |
| <i>MIM1</i>      | <i>YOL026c</i>  | Mitochondria                |
| <i>PCS60</i>     | <i>YBR222C</i>  | Punctate                    |
| <i>PEX1</i>      | <i>YKL197C</i>  | Cytosol                     |
| <i>PEX11</i>     | <i>YOL147C</i>  | Punctate                    |
| <i>PEX12</i>     | <i>YMR026C</i>  | Punctate                    |
| <i>PEX13</i>     | <i>YLR191W</i>  | Punctate                    |
| <i>PEX15</i>     | <i>YOL044W</i>  | Punctate                    |
| <i>PEX2</i>      | <i>YJL210W</i>  | Punctate                    |
| <i>PEX27</i>     | <i>YOR193W</i>  | Punctate                    |
| <i>PEX3</i>      | <i>YDR329C</i>  | Punctate                    |
| <i>PEX34</i>     | <i>YCL056C</i>  | Punctate                    |
| <i>PEX7</i>      | <i>YDR142C</i>  | Punctate                    |
| <i>PHO88</i>     | <i>YBR106W</i>  | ER                          |
| <i>RVS167</i>    | <i>YDR388W</i>  | Cytosol, Punctate           |
| <i>SCT1</i>      | <i>YBL011W</i>  | ER                          |
| <i>SLM4</i>      | <i>YBR077C</i>  | Vacuole membrane            |
| <i>SPS19</i>     | <i>YNL202W</i>  | Punctate                    |
| <i>STE23</i>     | <i>YLR389C</i>  | Punctate, Mitochondria      |
| <i>STR3</i>      | <i>YGL184C</i>  | Punctate                    |
| <i>TES1</i>      | <i>YJR019C</i>  | Punctate                    |
| <i>VPS1</i>      | <i>YKR001C</i>  | Cytosol, Punctate           |
| <i>VPS24</i>     | <i>YKL041W</i>  | Cytosol                     |
| <i>YDJ1</i>      | <i>YNL064C</i>  | Cytosol                     |
| <i>YPT1</i>      | <i>YFL038C</i>  | Punctate                    |
|                  | <i>YBL010C</i>  | Punctate                    |

### Supplementary Table 3. Plasmids used in this study.

MS - Maya Schuldiner lab plasmids; MC - Mickael Cohen lab plasmids; ME - Mafalda Escobar lab plasmids.

| Plasmid number | Plasmid name                     | Description                                                                                                                                                                                                                                                                                                                  | Bacterial selection | Plasmid set | Plasmid use                            | Reference                                     |
|----------------|----------------------------------|------------------------------------------------------------------------------------------------------------------------------------------------------------------------------------------------------------------------------------------------------------------------------------------------------------------------------|---------------------|-------------|----------------------------------------|-----------------------------------------------|
| MS47           | pFA6a-KAN                        | Plasmid usefull as template for PCR for performing gene deletions, introducing the KAN selection marker.                                                                                                                                                                                                                     | Amp                 | pFA6        | Gene deletion                          | (Longtine et al., 1998) <sup>1</sup>          |
| MS49           | pFA6a-NAT                        | Plasmid usefull as template for PCR for performing gene deletions, introducing the NAT selection marker.                                                                                                                                                                                                                     | Amp                 | pFA6        | Gene deletion                          | (Goldstein et al., 1999) <sup>2</sup>         |
| MS107          | URA::TEF2pr-mCherry              | Plasmid usefull as template for PCR in order to introduce a fluorescent mCherry reporter. May also be used for gene deletions or N' terminal tagging of proteins.                                                                                                                                                            | Amp                 | pFA6        | Tag fusion and protein over expression | (Breslow et al ,2008) <sup>3</sup>            |
| MS108          | pFA6-Hygro                       | pFA6 based plasmid for KOs with Hygromycin resistance cassette                                                                                                                                                                                                                                                               | Amp                 | pFA6        | Gene deletion                          | (Goldstein et al., 1999) <sup>2</sup>         |
| MS446          | pFA6a-VC-His3MX6                 | Plasmid for C terminal tagging of ORF with split YFP (C terminal fragment). Sequence in GenBank under Accession No: EF210803                                                                                                                                                                                                 | Amp                 | pFA6        | Tag fusion                             | (Sung and Huh, 2007) <sup>4</sup>             |
| MS445          | pFA6a-VN-kanMX6                  | Plasmid for C terminal tagging of ORF with split YFP (N terminal fragment). Sequence in GenBank under Accession No: EF210808                                                                                                                                                                                                 | Amp                 | pFA6        | Tag fusion                             | (Sung and Huh, 2007) <sup>4</sup>             |
| MS457          | pFA6a-kanMX6-PCET1-VN            | Plasmid for constitutive expression of N terminally tagged ORF with split YFP (N terminal fragment). Sequence in GenBank under Accession No: EF521887                                                                                                                                                                        | Amp                 | pFA6        | Tag fusion                             | (Sung and Huh, 2007) <sup>4</sup>             |
| MS451          | pFA6a-kanMX6-PGAL1-VN            | Plasmid for inducible expression of N terminally tagged ORF with split YFP (N terminal fragment). Sequence in GenBank under Accession No: EF210812                                                                                                                                                                           | Amp                 | pFA6        | Tag fusion                             | (Sung and Huh, 2007) <sup>4</sup>             |
| MS686          | pFA6a-VC-Hygro                   | Plasmid for C terminal tagging of ORF with split YFP (C terminal fragment). Sequence in GenBank under Accession No: EF210803. Modified from (Sung and Huh, 2007) by Maria Bohnert, Schuldiner Lab (introduction of Hygro)                                                                                                    | Amp                 | pFA6        | Tag fusion                             | This Study                                    |
| MS700          | pFA6a-NAT-PCET1-VN               | Plasmid for constitutive expression of N terminally tagged ORF with split YFP (N terminal fragment). . Sequence in GenBank under Accession No: EF521883. Modified based on plasmid 455 for tagging with VN at the N with NAT instead of HIS selection. Modified from (Sung and Huh, 2007) by Yoav Peleg, Wiezmann instetute. | Amp                 | pFA6        | Tag fusion                             | This Study                                    |
| MS729          | pAG25-IFP-F1                     | split far red reporter IFP F1 NAT                                                                                                                                                                                                                                                                                            | Amp                 | pFA6        | Tag fusion                             | (Tchekanda et al, 2014) <sup>5</sup>          |
| MS730          | pAG32-IFP-F2                     | split far red reporter IFP F2 Hygro                                                                                                                                                                                                                                                                                          | Amp                 | pFA6        | Tag fusion                             | (Tchekanda et al, 2014) <sup>5</sup>          |
| MS21           | pFA6a-GFP(S65T)-HIS3MX6          | plasmid for making C' terminal GFP fusion proteins by PCR .                                                                                                                                                                                                                                                                  | Amp                 | pFA6        | Tag fusion                             | (Longtine et al., 1998) <sup>1</sup>          |
| MS22           | pFA6a-GFP(S65T)-KanMX6           | plasmid for making C' terminal GFP fusion proteins by PCR .                                                                                                                                                                                                                                                                  | Amp                 | pFA6        | Tag fusion                             | (Longtine et al., 1998) <sup>1</sup>          |
| MS179          | TEF2-GFP-ADH1                    | Plasmid For N terminally tagging any protein with GFP or KO a protein and replacing it with GFP                                                                                                                                                                                                                              | Amp                 | pFA6        | Tag fusion                             | David Breslow                                 |
| MS278          | pFa6a-mCherry-Nat                | Plasmid for making C terminal mCherry fusion proteins. Made by cutting pFA6a-Cherry-His3MX and pFa6a-NAT with Asc I/Sac, ligation of NAT fragment into the same site in pFA6a-Cherry Clone 1. Verified by restriction using Stu I / Sph I.                                                                                   | Amp                 | pFA6        | Tag fusion                             | Tomer Ravid                                   |
| MS371          | pADHpr mtBFP426                  | BFP targeted to mitochondria                                                                                                                                                                                                                                                                                                 | Amp                 | 2micron     | Expression plasmid                     | Christian Ungermann                           |
| MS618          | pLC06:pRS416_PEX5pr_CFP-SNAP-SKL | Plasmid to express CFP with a PTS1 signal                                                                                                                                                                                                                                                                                    | Amp                 | pRS416      | Expression plasmid                     | Ralf Erdmann                                  |
| MS616          | pAR2::GFP-SKL                    | pAR2::GFP-SKL                                                                                                                                                                                                                                                                                                                | Amp                 | CEN         | Expression plasmid                     | Ralf Erdmann                                  |
| MC374          | JMG435                           | pRS316-mRFP-SKL                                                                                                                                                                                                                                                                                                              | Amp                 | CEN         | Expression plasmid                     | (Fagarasanu, et al 2009) <sup>6</sup>         |
| ME8            | pRS316                           | Empty vector pRS316, cen, Ura3                                                                                                                                                                                                                                                                                               | Amp                 | pRS         | Cloning                                | (Sikorski and Hieter, 1989) <sup>7</sup>      |
| ME10           | HA-Fzo1 on pRS316                | HA-Fzo1 on pRS316, cen, Ura3                                                                                                                                                                                                                                                                                                 | Amp                 | pRS         | Expression of HA-Fzo1                  | (Escobar-Henriques et al., 2006) <sup>8</sup> |



## Supplementary Table 4. Yeast strains used in this study.

MS - Maya Schuldiner lab yeast strains ; MC - Mickael Cohen lab yeast strains

| Strain Number | Strain Name                    | Genotype                                                                                                                                                                                                       | Mating Type | Comments  |
|---------------|--------------------------------|----------------------------------------------------------------------------------------------------------------------------------------------------------------------------------------------------------------|-------------|-----------|
| MS2714        | Split NVJ                      | his3delta1 leu2delta0 lys2+/lys+ met15delta0 ura3delta0 can1Δ::STE2pr-sp HIS5 lyp1Δ::STE3pr-LEU2; Zrc1-VC-His; Sec63-VN-Kan                                                                                    | alpha       |           |
| MS2717        | Split MAM                      | his3delta1 leu2delta0 lys2+/lys+ met15delta0 ura3delta0 can1Δ::STE2pr-sp HIS5 lyp1Δ::STE3pr-LEU2; Tom20-VC-His; Sec63-VN-Kan                                                                                   | alpha       |           |
| MS2814        | Split vCLAMP                   | his3delta1 leu2delta0 lys2+/lys+ met15delta0 ura3delta0 can1Δ::STE2pr-sp HIS5 lyp1Δ::STE3pr-LEU2; Tom20-VC-His; Zrc1-VN-Kan                                                                                    | alpha       |           |
| MS2815        | Split NVJ + Nvj1-mCherry       | his3delta1 leu2delta0 lys2+/lys+ met15delta0 ura3delta0 can1Δ::STE2pr-sp HIS5 lyp1Δ::STE3pr-LEU2; Zrc1-VC-His; Sec63-VN-Kan; Nvj1-mCherry-Nat                                                                  | alpha       |           |
| MS2777        | Split MAM + Mdm34-mCherry      | his3delta1 leu2delta0 lys2+/lys+ met15delta0 ura3delta0 can1Δ::STE2pr-sp HIS5 lyp1Δ::STE3pr-LEU2; Tom20-VC-His; Sec63-VN-Kan; Mdm34-mCherry-Nat                                                                | alpha       |           |
| MS2819        | Split NVJ + mCherry-Mdm1       | his3delta1 leu2delta0 lys2+/lys+ met15delta0 ura3delta0 can1Δ::STE2pr-sp HIS5 lyp1Δ::STE3pr-LEU2; Zrc1-VC-His; Sec63-VN-Kan; Tef2-Ura-mCherry-Mdm1                                                             | alpha       |           |
| MS2774        | Split NVJ + <i>Avac8</i>       | his3delta1 leu2delta0 lys2+/lys+ met15delta0 ura3delta0 can1Δ::STE2pr-sp HIS5 lyp1Δ::STE3pr-LEU2; Zrc1-VC-His; Sec63-VN-Kan; $\Delta$ vac8::Nat                                                                | alpha       |           |
| MS2816        | Split NVJ + <i>Anvj1</i>       | his3delta1 leu2delta0 lys2+/lys+ met15delta0 ura3delta0 can1Δ::STE2pr-sp HIS5 lyp1Δ::STE3pr-LEU2; Zrc1-VC-His; Sec63-VN-Kan; <i>Anvj1</i> ::Nat                                                                | alpha       |           |
| MS2817        | Split MAM + <i>Δmdm34</i>      | his3delta1 leu2delta0 lys2+/lys+ met15delta0 ura3delta0 can1Δ::STE2pr-sp HIS5 lyp1Δ::STE3pr-LEU2; Tom20-VC-His; Sec63-VN-Kan; <i>Δmdm34</i> ::Nat                                                              | alpha       |           |
| MS2818        | Split MAM + <i>Δmmm1</i>       | his3delta1 leu2delta0 lys2+/lys+ met15delta0 ura3delta0 can1Δ::STE2pr-sp HIS5 lyp1Δ::STE3pr-LEU2; Tom20-VC-His; Sec63-VN-Kan; <i>Δmmm1</i> ::Nat                                                               | alpha       |           |
| MS3871        | Split ER-PM on SEY6210.1       | leu2-3,112 ura3-52 his3-Δ 200 trp1-Δ901 lys2-801 suc2-Δ9 ; Sec63-VC-Hygro ; Nat-PCET-VN-Pmp3                                                                                                                   | a           | SEY6210.1 |
| MS3880        | Δ6 tether + Split ER-PM        | leu2-3,112 ura3-52 his3-Δ 200 trp1-Δ901 lys2-801 suc2-Δ9; ist2Δ::HISMX6 scs2Δ::TRP1 scs2Δ::HISMX6 tcb1Δ::KANMX6 tcb2Δ::KANMX6 tcb3Δ::HISMX6 ; Sec63-VC-Hygro ; Nat-PCET-VN-Pmp3                                | a           | SEY6210.1 |
| MS2778        | Split MAM + mCherry-Lam6       | his3delta1 leu2delta0 lys2+/lys+ met15delta0 ura3delta0 can1Δ::STE2pr-sp HIS5 lyp1Δ::STE3pr-LEU2; Tom20-VC-His; Sec63-VN-Kan; Tef2-Ura-mCherry-Lam6                                                            | alpha       |           |
| MS2820        | Split vCLAMP + mCherry-Vam6    | his3delta1 leu2delta0 lys2+/lys+ met15delta0 ura3delta0 can1Δ::STE2pr-sp HIS5 lyp1Δ::STE3pr-LEU2; Tom20-VC-His; Zrc1-VN-Kan; Tef2-Ura-mCherry-Vam6                                                             | alpha       |           |
| MS2881        | Split PM-Mito                  | his3Δ1 leu2Δ0 met15Δ0 ura3Δ0; Ina1-VC-His; Tom70-VN-Kan                                                                                                                                                        | a           |           |
| MS2883        | Split Vac-PM                   | his3Δ1 leu2Δ0 met15Δ0 ura3Δ0; Ina1-VC-His; Zrc1-VN-Kan                                                                                                                                                         | a           |           |
| MS3441        | Split ER-PM                    | his3Δ1 leu2Δ0 met15Δ0 ura3Δ0; Ina1-VC-His; Pho88-VN-Kan                                                                                                                                                        | a           |           |
| MS2715        | Split LD-Mito                  | his3delta1 leu2delta0 lys2+/lys+ met15delta0 ura3delta0 can1Δ::STE2pr-sp HIS5 lyp1Δ::STE3pr-LEU2; Osw5-VC-His; Tom70-VN-Kan                                                                                    | alpha       |           |
| MS2882        | Split LD-PM                    | his3Δ1 leu2Δ0 met15Δ0 ura3Δ0; Ina1-VC-His; Osw5-VN-Kan                                                                                                                                                         | a           |           |
| MS2716        | Split LD-Vac                   | his3delta1 leu2delta0 lys2+/lys+ met15delta0 ura3delta0 can1Δ::STE2pr-sp HIS5 lyp1Δ::STE3pr-LEU2; Osw5-VC-His; Zrc1-VN-Kan                                                                                     | alpha       |           |
| MS2885        | Split LD-ER                    | his3Δ1 leu2Δ0 met15Δ0 ura3Δ0; Osw5-VC-His; Pho88-VN-Kan                                                                                                                                                        | a           |           |
| MS2658        | Split PerMit 1                 | his3delta1 leu2delta0 lys2+/lys+ met15delta0 ura3delta0 can1Δ::STE2pr-sp HIS5 lyp1Δ::STE3pr-LEU2; Tom20-VC-His; Pex11-VN-Kan                                                                                   | alpha       |           |
| MS3442        | Split Pex-PM                   | his3delta1 leu2delta0 lys2+/lys+ met15delta0 ura3delta0 can1Δ::STE2pr-sp HIS5 lyp1Δ::STE3pr-LEU2; Mep3-VC-His; Pex3-VN-Kan                                                                                     | alpha       |           |
| MS3443        | Split Pex-Vac                  | his3delta1 leu2delta0 lys2+/lys+ met15delta0 ura3delta0 can1Δ::STE2pr-sp HIS5 lyp1Δ::STE3pr-LEU2; Zrc1-VC-His; Pex25-VN-Kan                                                                                    | alpha       |           |
| MS3444        | Split Pex-ER                   | his3delta1 leu2delta0 lys2+/lys+ met15delta0 ura3delta0 can1Δ::STE2pr-sp HIS5 lyp1Δ::STE3pr-LEU2; Sec63-VC-His; Pex3-VN-Kan                                                                                    | alpha       |           |
| MS2098        | Split Pex-LD                   | his3delta1 leu2delta0 lys2+/lys+ met15delta0 ura3delta0 can1Δ::STE2pr-sp HIS5 lyp1Δ::STE3pr-LEU2; Osw5-VC-His; Pex3-VN-Kan                                                                                     | alpha       |           |
| MS2097        | Split PerMit 2                 | his3delta1 leu2delta0 lys2+/lys+ met15delta0 ura3delta0 can1Δ::STE2pr-sp HIS5 lyp1Δ::STE3pr-LEU2; Tom70-VC-His; Pex3-VN-Kan                                                                                    | alpha       |           |
| MS3445        | Split PerMit 3                 | his3delta1 leu2delta0 lys2+/lys+ met15delta0 ura3delta0 can1Δ::STE2pr-sp HIS5 lyp1Δ::STE3pr-LEU2; Tom70-VC-His; Pex11-VN-Kan                                                                                   | alpha       |           |
| MS3446        | Split PerMit 4                 | his3delta1 leu2delta0 lys2+/lys+ met15delta0 ura3delta0 can1Δ::STE2pr-sp HIS5 lyp1Δ::STE3pr-LEU2; Tom20-VC-His; Pex25-VN-Kan                                                                                   | alpha       |           |
| MS2094        | Split PerMit 5                 | his3delta1 leu2delta0 lys2+/lys+ met15delta0 ura3delta0 can1Δ::STE2pr-sp HIS5 lyp1Δ::STE3pr-LEU2; Tom70-VC-His; Pex25-VN-Kan                                                                                   | alpha       |           |
| MS2100        | Split PerMit 6                 | his3delta1 leu2delta0 lys2+/lys+ met15delta0 ura3delta0 can1Δ::STE2pr-sp HIS5 lyp1Δ::STE3pr-LEU2; Tom70-VC-His; Pex25-VN-Nat                                                                                   | alpha       |           |
| MS2663        | Split PerMit 5 + Tom20-mCherry | his3delta1 leu2delta0 lys2+/lys+ met15delta0 ura3delta0 can1Δ::STE2pr-sp HIS5 lyp1Δ::STE3pr-LEU2; Tom70-VC-His; Pex25-VN-Kan; Tom20-mCherry-Nat                                                                | alpha       |           |
| MS2660        | Split PerMit 5 + Pda1-mCherry  | his3delta1 leu2delta0 lys2+/lys+ met15delta0 ura3delta0 can1Δ::STE2pr-sp HIS5 lyp1Δ::STE3pr-LEU2; Tom70-VC-His; Pex25-VN-Kan; Pda1-mCherry-Nat                                                                 | alpha       |           |
| MS2659        | Split PerMit 5 + Mdm34-mCherry | his3delta1 leu2delta0 lys2+/lys+ met15delta0 ura3delta0 can1Δ::STE2pr-sp HIS5 lyp1Δ::STE3pr-LEU2; Tom70-VC-His; Pex25-VN-Nat; Mdm34-mCherry-Kan                                                                | alpha       |           |
| MS3447        | Split PerMit 5 + Mdm10 OE      | his3delta1 leu2delta0 lys2+/lys+ met15delta0 ura3delta0 can1Δ::STE2pr-sp HIS5 lyp1Δ::STE3pr-LEU2; can1Δ::GAL1pr-SceI::STE2pr-SpHIS5 lyp1Δ::STE3pr-LEU2 ; NAT::TEF2pr-mCherry-Mdm10; Tom70-VC-His; Pex25-VN-Kan | alpha       |           |
| MS3448        | Split PerMit 5+ Pcs60 OE       | his3delta1 leu2delta0 lys2+/lys+ met15delta0 ura3delta0 can1Δ::STE2pr-sp HIS5 lyp1Δ::STE3pr-LEU2; can1Δ::GAL1pr-SceI::STE2pr-SpHIS5 lyp1Δ::STE3pr-LEU2 ; NAT::TEF2pr-mCherry-PCS60; Tom70-VC-His; Pex25-VN-Kan | alpha       |           |
| MS3449        | Split PerMit 5+ Gem1 OE        | his3delta1 leu2delta0 lys2+/lys+ met15delta0 ura3delta0 can1Δ::STE2pr-sp HIS5 lyp1Δ::STE3pr-LEU2; can1Δ::GAL1pr-SceI::STE2pr-SpHIS5 lyp1Δ::STE3pr-LEU2 ; NAT::TEF2pr-mCherry-Gem1; Tom70-VC-His; Pex25-VN-Kan  | alpha       |           |
| MS3450        | Split PerMit 5+ Caf4 OE        | his3delta1 leu2delta0 lys2+/lys+ met15delta0 ura3delta0 can1Δ::STE2pr-sp HIS5 lyp1Δ::STE3pr-LEU2; can1Δ::GAL1pr-SceI::STE2pr-SpHIS5 lyp1Δ::STE3pr-LEU2 ; NAT::TEF2pr-mCherry-Caf4; Tom70-VC-His; Pex25-VN-Kan  | alpha       |           |
| MS3451        | Split PerMit 5 + Pex34 OE      | his3delta1 leu2delta0 lys2+/lys+ met15delta0 ura3delta0 can1Δ::STE2pr-sp HIS5 lyp1Δ::STE3pr-LEU2; can1Δ::GAL1pr-SceI::STE2pr-SpHIS5 lyp1Δ::STE3pr-LEU2 ; NAT::TEF2pr-mCherry-Pex34; Tom70-VC-His; Pex25-VN-Kan | alpha       |           |

|        |                                                     |                                                                                                                                                                                                                  |       |                                                |
|--------|-----------------------------------------------------|------------------------------------------------------------------------------------------------------------------------------------------------------------------------------------------------------------------|-------|------------------------------------------------|
| MS3452 | Split PerMit 5 + Fis1 OE                            | his3delta1 leu2delta0 lys2+/lys+ met15delta0 ura3delta0 can1Δ::STE2pr-sp HIS5 lyp1Δ::STE3pr-LEU2; can1Δ::GAL1pr-Scel::STE2pr-SpHIS5 lyp1Δ::STE3pr-LEU2 ; NAT::TEF2pr-mCherry-Fis1; Tom70-VC-His; Pex25-VN-Kan    | alpha |                                                |
| MS3453 | Split PerMit 5 + Pex11 OE                           | his3delta1 leu2delta0 lys2+/lys+ met15delta0 ura3delta0 can1Δ::STE2pr-sp HIS5 lyp1Δ::STE3pr-LEU2; can1Δ::GAL1pr-Scel::STE2pr-SpHIS5 lyp1Δ::STE3pr-LEU2 ; NAT::TEF2pr-mCherry-Pex11; Tom70-VC-His; Pex25-VN-Kan   | alpha |                                                |
| MS3454 | Split PerMit 5 + Fzo1 OE                            | his3delta1 leu2delta0 lys2+/lys+ met15delta0 ura3delta0 can1Δ::STE2pr-sp HIS5 lyp1Δ::STE3pr-LEU2; can1Δ::GAL1pr-Scel::STE2pr-SpHIS5 lyp1Δ::STE3pr-LEU2 ; NAT::TEF2pr-mCherry-Fzo1; Tom70-VC-His; Pex25-VN-Kan    | alpha |                                                |
| MS3455 | Split PerMit 5 + Ste23 OE                           | his3delta1 leu2delta0 lys2+/lys+ met15delta0 ura3delta0 can1Δ::STE2pr-sp HIS5 lyp1Δ::STE3pr-LEU2; can1Δ::GAL1pr-Scel::STE2pr-SpHIS5 lyp1Δ::STE3pr-LEU2 ; NAT::TEF2pr-mCherry-Ste23; Tom70-VC-His; Pex25-VN-Kan   | alpha |                                                |
| MS3456 | Split PerMit 5+ Inp2 OE                             | his3delta1 leu2delta0 lys2+/lys+ met15delta0 ura3delta0 can1Δ::STE2pr-sp HIS5 lyp1Δ::STE3pr-LEU2; can1Δ::GAL1pr-Scel::STE2pr-SpHIS5 lyp1Δ::STE3pr-LEU2 ; NAT::TEF2pr-mCherry-Inp2; Tom70-VC-His; Pex25-VN-Kan    | alpha |                                                |
| MS3457 | Split PerMit 5 + Ant1 OE                            | his3delta1 leu2delta0 lys2+/lys+ met15delta0 ura3delta0 can1Δ::STE2pr-sp HIS5 lyp1Δ::STE3pr-LEU2; can1Δ::GAL1pr-Scel::STE2pr-SpHIS5 lyp1Δ::STE3pr-LEU2 ; NAT::TEF2pr-mCherry-Ant1; Tom70-VC-His; Pex25-VN-Kan    | alpha |                                                |
| MS3458 | Split PerMit 5+ Inp1 OE                             | his3delta1 leu2delta0 lys2+/lys+ met15delta0 ura3delta0 can1Δ::STE2pr-sp HIS5 lyp1Δ::STE3pr-LEU2; can1Δ::GAL1pr-Scel::STE2pr-SpHIS5 lyp1Δ::STE3pr-LEU2 ; NAT::TEF2pr-mCherry-Inp1; Tom70-VC-His; Pex25-VN-Kan    | alpha |                                                |
| MS3459 | Split PerMit 5 SGA Control                          | his3delta1 leu2delta0 lys2+/lys+ met15delta0 ura3delta0 can1Δ::STE2pr-sp HIS5 lyp1Δ::STE3pr-LEU2; can1Δ::GAL1pr-Scel::STE2pr-SpHIS5 lyp1Δ::STE3pr-LEU2 ; his3Δ1::NAT::TEF2pr-mCherry; Tom70-VC-His; Pex25-VN-Kan | alpha |                                                |
| MS3296 | Split PerMit 5 + Fzo1 OE                            | his3delta1 leu2delta0 lys2+/lys+ met15delta0 ura3delta0 can1Δ::STE2pr-sp HIS5 lyp1Δ::STE3pr-LEU2; Tom70-VC-His; Pex25-VN-Kan; Nat::Tef2-mCherry-Fzo1                                                             | alpha |                                                |
| MS3298 | Split PerMit 5 + N <sup>547</sup> Truncated Fzo1 OE | his3delta1 leu2delta0 lys2+/lys+ met15delta0 ura3delta0 can1Δ::STE2pr-sp HIS5 lyp1Δ::STE3pr-LEU2; Tom70-VC-His; Pex25-VN-Kan; Nat::Tef2-mCherry-Fzo1-N <sup>547</sup> Truncated                                  | alpha |                                                |
| MS3740 | Split NVJ Far Red                                   | his3Δ1 leu2Δ0 met15Δ0 ura3Δ0 ;Zrc1-IFP-F2-Hygro;Sec63-IFP-F1-Nat                                                                                                                                                 | a     |                                                |
| MS3738 | Split MAM Far Red                                   | his3Δ1 leu2Δ0 met15Δ0 ura3Δ0 ; Sec63-IFP-F2-Hygro;Tom20-IFP-F1-Nat                                                                                                                                               | a     |                                                |
| MS3974 | Split ER-PM Far Red                                 | his3Δ1 leu2Δ0 met15Δ0 ura3Δ0 ; Pho88-IFP-F2-Hygro;Ina1-IFP-F1-Nat                                                                                                                                                | a     |                                                |
| MS3739 | Split vCLAMP Far Red                                | his3Δ1 leu2Δ0 met15Δ0 ura3Δ0 ; Zrc1-IFP-F2-Hygro;Tom20-IFP-F1-Nat                                                                                                                                                | a     |                                                |
| MS3741 | Split Vac-PM Far Red                                | his3Δ1 leu2Δ0 met15Δ0 ura3Δ0 ; Ina1-IFP-F2-Hygro;Zrc1-IFP-F1-Nat                                                                                                                                                 | a     |                                                |
| MS3742 | Split LD-PM Far Red                                 | his3Δ1 leu2Δ0 met15Δ0 ura3Δ0 ; Ina1-IFP-F2-Hygro;Osw5-IFP-F1-Nat                                                                                                                                                 | a     |                                                |
| MS3744 | Split Pex-Vac Far Red                               | his3Δ1 leu2Δ0 met15Δ0 ura3Δ0 ; Pex25-IFP-F2-Hygro;Zrc1-IFP-F1-Nat                                                                                                                                                | a     |                                                |
| MS3743 | Split Pex-PM Far Red                                | his3Δ1 leu2Δ0 met15Δ0 ura3Δ0 ; Ina1-IFP-F2-Hygro;Pex11-IFP-F1-Nat                                                                                                                                                | a     |                                                |
| MS3735 | Split PerMit Far Red                                | his3Δ1 leu2Δ0 met15Δ0 ura3Δ0 ; Tom70-IFP-F2-Hygro;Pex25-IFP-F1-Nat                                                                                                                                               | a     |                                                |
| MS3857 | Split MAM Far Red + Δmnm34                          | his3Δ1 leu2Δ0 met15Δ0 ura3Δ0 ; Δmnm34;Kan; Sec63-IFP-F2-Hygro;Tom20-IFP-F1-Nat                                                                                                                                   | a     |                                                |
| MS3858 | Split MAM Far Red + Δmmm1                           | his3Δ1 leu2Δ0 met15Δ0 ura3Δ0 ; Δmmm1;Kan; Sec63-IFP-F2-Hygro;Tom70-IFP-F1-Nat                                                                                                                                    | a     |                                                |
| MS3865 | Split PerMit Far Red + Pex3;GFP                     | his3Δ1 leu2Δ0 met15Δ0 ura3Δ0 ; Tom70-IFP-F2-Hygro;Pex25-IFP-F1-Nat ; Pex3;GFP-His                                                                                                                                | a     |                                                |
| MS3866 | Split PerMit Far Red + Tom20;GFP                    | his3Δ1 leu2Δ0 met15Δ0 ura3Δ0 ; Tom70-IFP-F2-Hygro;Pex25-IFP-F1-Nat ; Tom20;GFP-His                                                                                                                               | a     |                                                |
| MS3867 | Split PerMit Far Red + Pex34 OE                     | his3Δ1 leu2Δ0 met15Δ0 ura3Δ0 ; Tom70-IFP-F2-Hygro;Pex25-IFP-F1-Nat ; Tef2-GFP-Kan;Pex34                                                                                                                          | a     |                                                |
| MS3921 | Split PerMit Far Red + Fzo1 OE                      | his3Δ1 leu2Δ0 met15Δ0 ura3Δ0 ; Tom70-IFP-F2-Hygro;Pex25-IFP-F1-Nat ; Tef2-GFP-Kan;Fzo1                                                                                                                           | a     |                                                |
| MS3301 | Tom70-GFP + Fzo1 OE                                 | his3Δ1 leu2Δ0 met15Δ0 ura3Δ0; Tom70-GFP-His; Nat::Tef2-mCherry-Fzo1                                                                                                                                              | a     |                                                |
| MS3620 | Tom70-GFP                                           | his3Δ1 leu2Δ0 met15Δ0 ura3Δ0; Tom70-GFP-His                                                                                                                                                                      | a     | (Huh et al 2003) <sup>9</sup> . C' GFP library |
| MS3460 | Pex3-VC + Cytosolic-VN                              | his3delta1 leu2delta0 lys2+/lys+ met15delta0 ura3delta0 can1Δ::STE2pr-sp HIS5 lyp1Δ::STE3pr-LEU2; Pex3-VC-His; Kan-PCET1-VN                                                                                      |       |                                                |
| MS3461 | Tom70-VC + Cytosolic-VN                             | his3Δ1 leu2Δ0 met15Δ0 ura3Δ0; Tom70-VC-His; Kan-PCET1-VN                                                                                                                                                         | a     |                                                |
| MS3462 | Ina1-VC + Cytosolic-VN                              | his3Δ1 leu2Δ0 met15Δ0 ura3Δ0; Ina1-VC-His; Kan-PCET1-VN                                                                                                                                                          | a     |                                                |
| MS3463 | Pho88-VC + Cytosolic-VN                             | his3delta1 leu2delta0 lys2+/lys+ met15delta0 ura3delta0 can1Δ::STE2pr-sp HIS5 lyp1Δ::STE3pr-LEU2; Pho88-VC-His; Kan-PCET1-VN                                                                                     |       |                                                |
| MS3464 | Osw5-VC + Cytosolic-VN                              | his3Δ1 leu2Δ0 met15Δ0 ura3Δ0; Osw5-VC-His; Kan-PCET1-VN                                                                                                                                                          | a     |                                                |
| MS3465 | Zrc1-VC + Cytosolic-VN                              | his3Δ1 leu2Δ0 met15Δ0 ura3Δ0; Zrc1-VC-His; Kan-PCET1-VN                                                                                                                                                          | a     |                                                |
| MS3876 | Inducible split PerMit + Mdm34;Cherry               | his3Δ1 leu2Δ0 met15Δ0 ura3Δ0 ; Tom70-VC-His; Gal-VN-Kan-Pex25 ; Mdm34;Cherry;Nat                                                                                                                                 | a     |                                                |
| MS3877 | Inducible split PerMit + Pda1;Cherry                | his3Δ1 leu2Δ0 met15Δ0 ura3Δ0 ; Tom70-VC-His; Gal-VN-Kan-Pex25 ; Pda1;Cherry;Nat                                                                                                                                  | a     |                                                |
| MS2661 | Split PerMit 5 + Pex11-mCherry                      | his3delta1 leu2delta0 lys2+/lys+ met15delta0 ura3delta0 can1Δ::STE2pr-sp HIS5 lyp1Δ::STE3pr-LEU2; Tom70-VC-His; Pex25-VN-Kan; Pex11-mCherry-Nat                                                                  | alpha |                                                |
| MS3466 | Split PerMit 2 + Fzo1 OE                            | his3delta1 leu2delta0 lys2+/lys+ met15delta0 ura3delta0 can1Δ::STE2pr-sp HIS5 lyp1Δ::STE3pr-LEU2; Tom70-VC-His; Pex3-VN-Kan; Ura::Tef2-mCherry-Fzo1h                                                             | alpha |                                                |
| MS3467 | Split PerMit 1 + Fzo1 OE                            | his3delta1 leu2delta0 lys2+/lys+ met15delta0 ura3delta0 can1Δ::STE2pr-sp HIS5 lyp1Δ::STE3pr-LEU2; Tom20-VC-His; Pex11-VN-Kan; Ura::Tef2-mCherry-Fzo1                                                             | alpha |                                                |
| MS3468 | Split PerMit 5 + Pex34 OE                           | his3delta1 leu2delta0 lys2+/lys+ met15delta0 ura3delta0 can1Δ::STE2pr-sp HIS5 lyp1Δ::STE3pr-LEU2; Tom70-VC-His; Pex25-VN-Kan; Ura::Tef2-mCherry-Pex34                                                            | alpha |                                                |
| MS3469 | Split PerMit 2 + Pex34 OE                           | his3delta1 leu2delta0 lys2+/lys+ met15delta0 ura3delta0 can1Δ::STE2pr-sp HIS5 lyp1Δ::STE3pr-LEU2; Tom70-VC-His; Pex3-VN-Kan; Ura::Tef2-mCherry-Pex34                                                             | alpha |                                                |
| MS3470 | Split PerMit 1 + Pex34 OE                           | his3delta1 leu2delta0 lys2+/lys+ met15delta0 ura3delta0 can1Δ::STE2pr-sp HIS5 lyp1Δ::STE3pr-LEU2; Tom20-VC-His; Pex11-VN-Kan; Ura::Tef2-mCherry-Pex34                                                            | alpha |                                                |
| MS3922 | Split PerMit 5 + Δpex11                             | his3delta1 leu2delta0 lys2+/lys+ met15delta0 ura3delta0 can1Δ::STE2pr-sp HIS5 lyp1Δ::STE3pr-LEU2; Tom70-VC-His; Pex25-VN-Kan; ΔPex11-Kan                                                                         | alpha |                                                |

|                         |                                                   |                                                                                                                                                                                                                                                                          |       |                                                             |
|-------------------------|---------------------------------------------------|--------------------------------------------------------------------------------------------------------------------------------------------------------------------------------------------------------------------------------------------------------------------------|-------|-------------------------------------------------------------|
| MS3923                  | Split PerMit 5 + $\Delta$ fzo1                    | his3delta1 leu2delta0 lys2+/lys+ met15delta0 ura3delta0 can1 $\Delta$ ::STE2pr-sp HIS5 lyp1 $\Delta$ ::STE3pr-LEU2; Tom70-VC-His; Pex25-VN-Kan; $\Delta$ Fzo1-Kan                                                                                                        | alpha |                                                             |
| MS3924                  | Split PerMit 5+ $\Delta$ pex34                    | his3delta1 leu2delta0 lys2+/lys+ met15delta0 ura3delta0 can1 $\Delta$ ::STE2pr-sp HIS5 lyp1 $\Delta$ ::STE3pr-LEU2; Tom70-VC-His; Pex25-VN-Kan; $\Delta$ Pex34-Kan                                                                                                       | alpha |                                                             |
| MS2561                  | Pex3-GFP                                          | PEX3-GFP::HIS ; his3 $\Delta$ 1 leu2 $\Delta$ 0 met15 $\Delta$ 0 ura3 $\Delta$ 0                                                                                                                                                                                         | a     |                                                             |
| MS3627                  | Pex3-GFP + Pex34 OE                               | his3delta1 leu2delta0 lys2+/lys+ met15delta0 ura3delta0 can1 $\Delta$ ::STE2pr-sp HIS5 lyp1 $\Delta$ ::STE3pr-LEU2; can1 $\Delta$ ::GAL1pr-SceI::STE2pr-SpHIS5 lyp1 $\Delta$ ::STE3pr-LEU2 ; NAT::TEF2pr-mCherry-Pex34; Pex3-GFP::His                                    | alpha |                                                             |
| C' GFP library          | Mdm34-GFP                                         | his3 $\Delta$ 1 leu2 $\Delta$ 0 met15 $\Delta$ 0 ura3 $\Delta$ 0; Mdm34-GFP-His                                                                                                                                                                                          | a     | (Huh et al 2003) <sup>9</sup> . C' GFP library              |
| MS3473                  | Fzo1 OE + Mdm34-GFP                               | his3delta1 leu2delta0 lys2+/lys+ met15delta0 ura3delta0 can1 $\Delta$ ::STE2pr-sp HIS5 lyp1 $\Delta$ ::STE3pr-LEU2; can1 $\Delta$ ::GAL1pr-SceI::STE2pr-SpHIS5 lyp1 $\Delta$ ::STE3pr-LEU2 ; NAT::TEF2pr-mCherry-Fzo1 Mdm34-GFP-Kan                                      | alpha |                                                             |
| MS3475                  | Pex34 OE + Mdm34-GFP                              | his3delta1 leu2delta0 lys2+/lys+ met15delta0 ura3delta0 can1 $\Delta$ ::STE2pr-sp HIS5 lyp1 $\Delta$ ::STE3pr-LEU2; can1 $\Delta$ ::GAL1pr-SceI::STE2pr-SpHIS5 lyp1 $\Delta$ ::STE3pr-LEU2 ; NAT::TEF2pr-mCherry-Pex34; Mdm34-GFP-Kan                                    | alpha |                                                             |
| MS3477                  | Split MAM + Fzo1 OE                               | his3delta1 leu2delta0 lys2+/lys+ met15delta0 ura3delta0 can1 $\Delta$ ::STE2pr-sp HIS5 lyp1 $\Delta$ ::STE3pr-LEU2; Tom20-VC-His; Sec63-VN-Kan; Ura::Tef2-mCherry-Fzo1                                                                                                   | alpha |                                                             |
| MS3478                  | Split MAM + Pex34 OE                              | his3delta1 leu2delta0 lys2+/lys+ met15delta0 ura3delta0 can1 $\Delta$ ::STE2pr-sp HIS5 lyp1 $\Delta$ ::STE3pr-LEU2; Tom20-VC-His; Sec63-VN-Kan; Ura::Tef2-mCherry-Pex34                                                                                                  | alpha |                                                             |
| MS3976                  | Split Pex-PM + Pex34 OE                           | his3delta1 leu2delta0 lys2+/lys+ met15delta0 ura3delta0 can1 $\Delta$ ::STE2pr-sp HIS5 lyp1 $\Delta$ ::STE3pr-LEU2; Mep3-VC-His; Pex3-VN-Kan; Tef2-mCherry-URA-Pex34                                                                                                     | alpha |                                                             |
| MS3977                  | Split Pex-Vac + Pex34 OE                          | his3delta1 leu2delta0 lys2+/lys+ met15delta0 ura3delta0 can1 $\Delta$ ::STE2pr-sp HIS5 lyp1 $\Delta$ ::STE3pr-LEU2; Zrc1-VC-His; Pex25-VN-Kan; Tef2-mCherry-URA-Pex34                                                                                                    | alpha |                                                             |
| MS3978                  | Split Pex-ER + Pex34 OE                           | his3delta1 leu2delta0 lys2+/lys+ met15delta0 ura3delta0 can1 $\Delta$ ::STE2pr-sp HIS5 lyp1 $\Delta$ ::STE3pr-LEU2; Sec63-VC-His; Pex3-VN-Kan; Tef2-mCherry-URA-Pex34                                                                                                    | alpha |                                                             |
| MS3979                  | Split Pex-LD + Pex34 OE                           | his3delta1 leu2delta0 lys2+/lys+ met15delta0 ura3delta0 can1 $\Delta$ ::STE2pr-sp HIS5 lyp1 $\Delta$ ::STE3pr-LEU2; Osw5-VC-His; Pex3-VN-Kan; Tef2-mCherry-URA-Pex34                                                                                                     | alpha |                                                             |
| MS3980                  | Split Pex-PM + Fzo1 OE                            | his3delta1 leu2delta0 lys2+/lys+ met15delta0 ura3delta0 can1 $\Delta$ ::STE2pr-sp HIS5 lyp1 $\Delta$ ::STE3pr-LEU2; Mep3-VC-His; Pex3-VN-Kan; Tef2-mCherry-URA-Fzo1                                                                                                      | alpha |                                                             |
| MS3981                  | Split Pex-Vac + Fzo1 OE                           | his3delta1 leu2delta0 lys2+/lys+ met15delta0 ura3delta0 can1 $\Delta$ ::STE2pr-sp HIS5 lyp1 $\Delta$ ::STE3pr-LEU2; Zrc1-VC-His; Pex25-VN-Kan; Tef2-mCherry-URA-Fzo1                                                                                                     | alpha |                                                             |
| MS3982                  | Split Pex-ER + Fzo1 OE                            | his3delta1 leu2delta0 lys2+/lys+ met15delta0 ura3delta0 can1 $\Delta$ ::STE2pr-sp HIS5 lyp1 $\Delta$ ::STE3pr-LEU2; Sec63-VC-His; Pex3-VN-Kan; Tef2-mCherry-URA-Fzo1                                                                                                     | alpha |                                                             |
| MS3983                  | Split Pex-LD + Fzo1 OE                            | his3delta1 leu2delta0 lys2+/lys+ met15delta0 ura3delta0 can1 $\Delta$ ::STE2pr-sp HIS5 lyp1 $\Delta$ ::STE3pr-LEU2; Osw5-VC-His; Pex3-VN-Kan; Tef2-mCherry-URA-Fzo1                                                                                                      | alpha |                                                             |
| MS3881                  | Pex25::GFP                                        | his3 $\Delta$ 1 leu2 $\Delta$ 0 met15 $\Delta$ 0 ura3 $\Delta$ 0 ; Pex25::GFP::Kan                                                                                                                                                                                       | a     |                                                             |
| MS3861                  | Tom70::GFP + Fzo1 OE                              | his3 $\Delta$ 1 leu2 $\Delta$ 0 met15 $\Delta$ 0 ura3 $\Delta$ 0 ; Tom70::GFP::His ; Tef2-mCherry-Ura:Fzo1                                                                                                                                                               | a     |                                                             |
| MS3862                  | Tom70::GFP + Pex34 OE                             | his3 $\Delta$ 1 leu2 $\Delta$ 0 met15 $\Delta$ 0 ura3 $\Delta$ 0 ; Tom70::GFP::His ; Tef2-mCherry-Ura:Pex34                                                                                                                                                              | a     |                                                             |
| MS3863                  | Pex25::GFP + Fzo1 OE                              | his3delta1 leu2delta0 lys2+/lys+ met15delta0 ura3delta0 can1 $\Delta$ ::STE2pr-sp HIS5 lyp1 $\Delta$ ::STE3pr-LEU2; can1 $\Delta$ ::GAL1pr-SceI::STE2pr-SpHIS5 lyp1 $\Delta$ ::STE3pr-LEU2 ; Tef2-mCherry-Nat:Fzo1 ; Pex25::GFP-Kan                                      | alpha |                                                             |
| MS3864                  | Pex25::GFP + Pex34 OE                             | his3delta1 leu2delta0 lys2+/lys+ met15delta0 ura3delta0 can1 $\Delta$ ::STE2pr-sp HIS5 lyp1 $\Delta$ ::STE3pr-LEU2; can1 $\Delta$ ::GAL1pr-SceI::STE2pr-SpHIS5 lyp1 $\Delta$ ::STE3pr-LEU2 ; Tef2-mCherry-Nat:Pex34 ; Pex25::GFP-Kan                                     | alpha |                                                             |
| MS3951                  | Pex34 OE + $\Delta$ pex3                          | his3delta1 leu2delta0 lys2+/lys+ met15delta0 ura3delta0 can1 $\Delta$ ::STE2pr-sp HIS5 lyp1 $\Delta$ ::STE3pr-LEU2; Mep3-VC-His; Pex3-VN-Kan; Tef2-mCherry-NAT-Pex34; $\Delta$ pex3::KAN                                                                                 | a     |                                                             |
| MS3859                  | Split PerMit + Fzo1 OE + $\Delta$ Pex34           | his3delta1 leu2delta0 lys2+/lys+ met15delta0 ura3delta0 can1 $\Delta$ ::STE2pr-sp HIS5 lyp1 $\Delta$ ::STE3pr-LEU2 ; NAT::TEF2pr-mCherry-Fzo1; Tom70-VC-His; Pex25-VN-Kan; $\Delta$ Pex34::Hygro                                                                         | a     |                                                             |
| MS3952                  | Split PerMi + Pex34 OE + $\Delta$ Fzo1            | his3delta1 leu2delta0 lys2+/lys+ met15delta0 ura3delta0 can1 $\Delta$ ::STE2pr-sp HIS5 lyp1 $\Delta$ ::STE3pr-LEU2; Tom70-VC-His; Pex25-VN-Kan; Tef2-mCherry::Ura:Pex34; $\Delta$ Fzo1-Kan                                                                               | alpha |                                                             |
| MS3618                  | Split PerMit 5 + Pex34 OE + $\Delta$ cit2         | his3delta1 leu2delta0 lys2+/lys+ met15delta0 ura3delta0 can1 $\Delta$ ::STE2pr-sp HIS5 lyp1 $\Delta$ ::STE3pr-LEU2; can1 $\Delta$ ::GAL1pr-SceI::STE2pr-SpHIS5 lyp1 $\Delta$ ::STE3pr-LEU2 ; NAT::TEF2pr-mCherry-Pex34; Tom70-VC-His; Pex25-VN-Kan; $\Delta$ cit2::Hygro | alpha |                                                             |
| MS3619                  | Split PerMit 5 + Pex34 OE + $\Delta$ cat2         | his3delta1 leu2delta0 lys2+/lys+ met15delta0 ura3delta0 can1 $\Delta$ ::STE2pr-sp HIS5 lyp1 $\Delta$ ::STE3pr-LEU2; can1 $\Delta$ ::GAL1pr-SceI::STE2pr-SpHIS5 lyp1 $\Delta$ ::STE3pr-LEU2 ; NAT::TEF2pr-mCherry-Pex34; Tom70-VC-His; Pex25-VN-Kan; $\Delta$ cat2::Hygro | alpha |                                                             |
| MS3479                  | $\Delta$ pex3                                     | his3 $\Delta$ 1 leu2 $\Delta$ 0 met15 $\Delta$ 0 ura3 $\Delta$ 0 ; $\Delta$ pex3::Kan                                                                                                                                                                                    | a     |                                                             |
| SWAT N' mCherry library | SWAT control                                      | his3delta1 leu2delta0 lys2+/lys+ met15delta0 ura3delta0 can1 $\Delta$ ::STE2pr-sp HIS5 lyp1 $\Delta$ ::STE3pr-LEU2; can1 $\Delta$ ::GAL1pr-SceI::STE2pr-SpHIS5 lyp1 $\Delta$ ::STE3pr-LEU2 ; his3 $\Delta$ 1::NAT::TEF2pr-mCherry                                        | alpha | (Yofe et al., 2016) <sup>10</sup> . SWAT N' mCherry library |
| MS83                    | BY4741                                            | his3 $\Delta$ 1 leu2 $\Delta$ 0 met15 $\Delta$ 0 ura3 $\Delta$ 0                                                                                                                                                                                                         | a     | WT                                                          |
| MS721                   | SGA Query                                         | his3delta1 leu2delta0 lys2+/lys+ met15delta0 ura3delta0; can1 $\Delta$ ::STE2pr-sp HIS5 lyp1 $\Delta$ ::STE3pr-LEU2                                                                                                                                                      | alpha | SGA Query strain                                            |
| MS115                   | S288C control+Kan                                 | his3 $\Delta$ 1 leu2 $\Delta$ 0 met15 $\Delta$ 0 ura3 $\Delta$ 0::KAN                                                                                                                                                                                                    | a     |                                                             |
| MS1658                  | $\Delta$ mdm34                                    | his3 $\Delta$ 1 leu2 $\Delta$ 0 met15 $\Delta$ 0 ura3 $\Delta$ 0; $\Delta$ mdm34::Kan                                                                                                                                                                                    | a     |                                                             |
| MS1661                  | $\Delta$ mmm1                                     | his3 $\Delta$ 1 leu2 $\Delta$ 0 met15 $\Delta$ 0 ura3 $\Delta$ 0 ; $\Delta$ mmm1::Kan                                                                                                                                                                                    | a     |                                                             |
| SWAT N' GFP library     | GFP-Pex14                                         | his3 $\Delta$ 1 leu2 $\Delta$ 0 met15 $\Delta$ 0 ura3 $\Delta$ 0; hph $\Delta$ ::URA3::SpNOP1pr-sfGFP-Pex14                                                                                                                                                              | a     | (Yofe et al., 2016) <sup>10</sup> . SWAT N' mCherry library |
| SWAT N' GFP library     | GFP-Pex19                                         | his3 $\Delta$ 1 leu2 $\Delta$ 0 met15 $\Delta$ 0 ura3 $\Delta$ 0; hph $\Delta$ ::URA3::SpNOP1pr-sfGFP-Pex19                                                                                                                                                              | a     | (Yofe et al., 2016) <sup>10</sup> . SWAT N' mCherry library |
| MC1423                  | W303- $\Delta$ mdm30 + Fzo1-GFP + pRS316-mRFP-SKL | ura3-1 trp1-1 leu2-3,112 his3-11,15 can1-100 RAD5 ADE2 mdm30::KanMX FZO1-EGFP::HIS3MX6 + pRS316-mRFP-SKL                                                                                                                                                                 | a     | W303                                                        |
| MC1119                  | W303-Fzo1-13Myc                                   | ura3-1 trp1-1 leu2-3,112 his3-11,15 can1-100 RAD5 ADE2 FZO1-13Myc::His3MX6                                                                                                                                                                                               | a     | W303                                                        |
| MC1131                  | W303- $\Delta$ mdm30 + Fzo1-13Myc                 | ura3-1 trp1-1 leu2-3,112 his3-11,15 can1-100 RAD5 ADE2 mdm30::KanMX FZO1-13Myc::His3MX6                                                                                                                                                                                  | alpha | W303                                                        |

## Supplementary References

1. Longtine, M. S. et al. Additional modules for versatile and economical PCR-based gene deletion and modification in *Saccharomyces cerevisiae*. *Yeast* 14, 953-961, doi:10.1002/(SICI)1097-0061(199807)14:10<953::AID-YEA293>3.0.CO;2-U (1998).
2. Goldstein, A. L. & McCusker, J. H. Three new dominant drug resistance cassettes for gene disruption in *Saccharomyces cerevisiae*. *Yeast* 15, 1541-1553, doi:10.1002/(SICI)1097-0061(199910)15:14<1541::AID-YEA476>3.0.CO;2-K (1999).
3. Breslow, D. K. et al. A comprehensive strategy enabling high-resolution functional analysis of the yeast genome. *Nature methods* 5, 711-718, doi:10.1038/nmeth.1234 (2008).
4. Sung, M. K. & Huh, W. K. Bimolecular fluorescence complementation analysis system for in vivo detection of protein-protein interaction in *Saccharomyces cerevisiae*. *Yeast* 24, 767-775, doi:10.1002/yea.1504 (2007).
5. Tchekanda, E., Sivanesan, D. & Michnick, S. W. An infrared reporter to detect spatiotemporal dynamics of protein-protein interactions. *Nature methods* 11, 641-644, doi:10.1038/nmeth.2934 (2014).
6. Fagarasanu, A. et al. Myosin-driven peroxisome partitioning in *S. cerevisiae*. *The Journal of cell biology* 186, 541-554, doi:10.1083/jcb.200904050 (2009).
7. Sikorski, R. S. & Hieter, P. A System of Shuttle Vectors and Yeast Host Strains Designed for Efficient Manipulation of DNA in *Saccharomyces-Cerevisiae*. *Genetics* 122, 19-27 (1989).
8. Escobar-Henriques, M., Westermann, B. & Langer, T. Regulation of mitochondrial fusion by the F-box protein Mdm30 involves proteasome-independent turnover of Fzo1. *The Journal of cell biology* 173, 645-650, doi:10.1083/jcb.200512079 (2006).
9. Huh, W. K. et al. Global analysis of protein localization in budding yeast. *Nature* 425, 686-691, doi:10.1038/nature02026 (2003).
10. Yofe, I. et al. One library to make them all: streamlining the creation of yeast libraries via a SWAp-Tag strategy. *Nature methods* 13, 371-378, doi:10.1038/nmeth.3795 (2016).
